# Supplementary material for: Treatment after traumatic shoulder dislocation: a systematic review with a network meta-analysis
Source: PubMed Central journal article supplement — Br J Sports Med. 2018 Jun 23;52(23):1498–506. doi: 10.1136/bjsports-2017-098539 (PMC6241619; doi:10.1136/bjsports-2017-098539), 2018-06-23
Supplement: bjsports-2017-098539supp001.pdf [file bjsports-2017-098539supp001.pdf]

## ***Literature search, searches May-June 2017 and update January 2018***

The search was conducted on May, 26, 29 and 30 and June 5, 2017 using 13 electronic databases: Ovid MEDLINE(R) Epub Ahead of Print, In-Process & Other Non-Indexed Citations, Ovid MEDLINE(R) Daily and Ovid MEDLINE(R) 1946 to Present, Cochrane Database of Systematic Reviews : Issue 5 of 12, May 2017 (Cochrane Library, Wiley), Cochrane Central Register of Controlled Trials : Issue 4 of 12, April 2017 (Cochrane Library, Wiley), Database of Abstracts of Reviews of Effect : Issue 2 of 4, April 2015, (Cochrane Library, Wiley), Health Technology Assessment Database : Issue 4 of 4, October 2016 (Cochrane Library, Wiley), NHS Economic Evaluation Database : Issue 2 of 4, April 2015 (Cochrane Library, Wiley), Web of Science – Core Collection (Core Collection, Indexes: SCI-EXPANDED, SSCI, A&HCI), CINAHL (EBSCOhost), Scopus and Embase. We didn't set any additional limits for time of publication.

The search was updated 15-16, January 2018.

Databases searched: Medline, Cochrane Database of Systematic Reviews (CDSR) and Cochrane Central Register of Controlled Trials (CCRT), Web of Science, CINAHL (EBSCOHost), Scopus and Embase.

Search strategies: the same as in may-june 2017

Limiters used: publication years 2017-2018.

### **Databases**

Ovid MEDLINE(R) Epub Ahead of Print, In-Process & Other Non-Indexed Citations, Ovid MEDLINE(R) Daily and Ovid MEDLINE(R) 1946 to Present (Search date: May 26,2017) (Search update: January 15, 2018)

Cochrane Central Register of Controlled Trials: Issue 4 of 12, April 2017 (Cochrane Library, Wiley) (Search date: May 26,2017) (Search update: January 15, 2018)

Cochrane Database of Systematic Reviews: Issue 5 of 12, May 2017(Cochrane Library, Wiley) (Search date: May 26,2017) (Search update: January 15, 2018)

Database of Abstracts of Reviews of Effect: Issue 2 of 4, April 2015 (Cochrane Library, Wiley) (Search date: 29.5.2017) (not updated)

Health Technology Assessment Database: Issue 4 of 4, October 2016 (Cochrane Library, Wiley) (Search date: May 29,2017) (not updated)

NHS Economic Evaluation Database: Issue 2 of 4, April 2015 (Search date: May 29,2017) (not updated)

Web of Science – Core Collection (Search date: May 29, 2017) (Search update: January 15, 2018)

CINAHL (EBSCOhost) (Search date: May 29, 2017) (Search update: January 15, 2018)

EMBASE (Search date: June 5, 2017) (Search update: January 15, 2018)

Scopus (Search date: May 30, 2017) (Search update: January 16, 2018)

### **Search terms**

Shoulder Joint, shoulder\*, glenohumer\*, Joint Instability, Shoulder Dislocation, hyperlaxit\* or laxit\* or unstab\* or instab\* or dislocat\* or luxat\* or sublumat\* or bankart\*

systematic reviews, meta-analysis, controlled clinical trial, randomized controlled trial

## Search strategy

### *OVID*

Database: Ovid MEDLINE(R) Epub Ahead of Print, In-Process & Other Non-Indexed Citations, Ovid MEDLINE(R) Daily and Ovid MEDLINE(R) <1946 to Present>

Search Strategy: 26.5.2017

---

- 1 exp Shoulder Joint/ (17102)
- 2 shoulder\*.ti,ab,kw. (60747)
- 3 glenohumer\*.ti,ab,kw. (5187)
- 4 exp Joint Instability/ (18142)
- 5 exp Shoulder Dislocation/ (5455)
- 6 (hyperlaxit\* or laxit\* or unstab\* or instab\* or dislocat\* or luxat\* or subluxat\* or bankart\*).ti,ab,kw. (213897)
- 7 1 or 2 or 3 (64463)
- 8 4 or 5 or 6 (220744)
- 9 7 and 8 (11133)
- 10 limit 9 to systematic reviews (267)
- 11 limit 9 to meta analysis (55)
- 12 limit 9 to controlled clinical trial (41)
- 13 limit 9 to randomized controlled trial (200)
- 14 10 or 11 or 12 or 13 (508)
- 15 Meta-Analysis as Topic/ (16034)
- 16 meta analy\$.tw. (114610)
- 17 metaanaly\$.tw. (1800)
- 18 Meta-Analysis/ (80422)
- 19 (systematic adj (review\$1 or overview\$1)).tw. (104382)
- 20 exp Review Literature as Topic/ (9500)
- 21 or/15-20 (208035)

- 22 cochrane.ab. (53857)
- 23 embase.ab. (56677)
- 24 (psychlit or psyclit).ab. (940)
- 25 (psychinfo or psycinfo).ab. (18209)
- 26 (cinahl or cinhal).ab. (18398)
- 27 science citation index.ab. (2667)
- 28 bids.ab. (444)
- 29 cancerlit.ab. (658)
- 30 or/22-29 (91701)
- 31 reference list\$.ab. (14295)
- 32 bibliograph\$.ab. (15191)
- 33 hand-search\$.ab. (5569)
- 34 relevant journals.ab. (1008)
- 35 manual search\$.ab. (3493)
- 36 or/31-35 (35425)
- 37 selection criteria.ab. (25943)
- 38 data extraction.ab. (15193)
- 39 37 or 38 (39113)
- 40 Review/ (2299594)
- 41 39 or 40 (2312754)
- 42 Comment/ (690924)
- 43 Letter/ (971882)
- 44 Editorial/ (439984)
- 45 animal/ (6117932)
- 46 human/ (16880012)
- 47 45 not (45 and 46) (4371439)

48 or/42-44,47 (5895542)

49 21 or 30 or 36 or 41 (2423513)

50 49 not 48 (2241031)

51 9 and 50 (1452)

52 14 or 51 (1736)

53 Randomized Controlled Trials as Topic/ (113387)

54 randomized controlled trial/ (463347)

55 Random Allocation/ (92704)

56 Double Blind Method/ (147255)

57 clinical trial/ (521527)

58 clinical trial, phase i.pt. (18737)

59 clinical trial, phase ii.pt. (30154)

60 clinical trial, phase iii.pt. (13785)

61 clinical trial, phase iv.pt. (1478)

62 controlled clinical trial.pt. (94084)

63 randomized controlled trial.pt. (463347)

64 multicenter study.pt. (227836)

65 clinical trial.pt. (521527)

66 exp Clinical Trials as topic/ (313273)

67 or/53-66 (1225756)

68 (clinical adj trial\$.tw. (299343)

69 ((singl\$ or doubl\$ or treb\$ or tripl\$) adj (blind\$3 or mask\$3)).tw. (157459)

70 PLACEBOS/ (34948)

71 placebo\$.tw. (195424)

72 randomly allocated.tw. (23351)

73 (allocated adj2 random\$.tw. (26363)

74 or/68-73 (545287)

75 67 or 74 (1439337)

76 case report.tw. (260611)

77 letter/ (971882)

78 historical article/ (347634)

79 or/76-78 (1566192)

80 75 not 79 (1406204)

81 9 and 80 (648)

82 52 or 81 (2061)

\*\*\*\*\*

***Cochrane Database of Systematic Reviews: Issue 5 of 12, May 2017 (Cochrane Library, Wiley)***

There are 12 results

Search Name: 2017\_7\_shoulder

Date Run: 26/05/17

ID Search

- #1 MeSH descriptor: [Shoulder Joint] explode all trees
- #2 glenohumer or shoulder
- #3 #1 or #2
- #4 MeSH descriptor: [Joint Instability] explode all trees
- #5 MeSH descriptor: [Shoulder Dislocation] explode all trees
- #6 hyperlaxit or laxit or unstab or instab or dislocat or luxat or subluxat or bankart
- #7 #4 or #5 or #6
- #8 #3 and #7

***Cochrane Central Register of Controlled Trials: Issue 4 of 12, April 2017 (Cochrane Library, Wiley)***

There are 171 results

Search Name: 2017\_7\_shoulder

Date Run: 26/05/17

ID Search

- #1 MeSH descriptor: [Shoulder Joint] explode all trees
- #2 glenohumer or shoulder
- #3 #1 or #2
- #4 MeSH descriptor: [Joint Instability] explode all trees
- #5 MeSH descriptor: [Shoulder Dislocation] explode all trees
- #6 hyperlaxit or laxit or unstab or instab or dislocat or luxat or subluxat or bankart
- #7 #4 or #5 or #6
- #8 #3 and #7

***Database of Abstracts of Reviews of Effect: Issue 2 of 4, April 2015***

There are 5 results

Search Name: 2017\_7\_shoulder

Date Run: 29/05/17

ID Search

- #1 shoulder or glenohumer (Word variations have been searched)
- #2 hyperlaxit or laxit or unstab or instab or dislocat or luxat or subluxat or bankart (Word variations have been searched)
- #3 #1 and #2

***Health Technology Assessment Database: Issue 4 of 4, October 2016***

There are 4 results

Search Name: 2017\_7\_shoulder\_HTA

Date Run: 29/05/17

ID Search

- #1 MeSH descriptor: [Shoulder Joint] 1 tree(s) exploded
- #2 glenohumer or shoulder
- #3 #1 or #2
- #4 MeSH descriptor: [Joint Instability] explode all trees
- #5 MeSH descriptor: [Shoulder Dislocation] explode all trees
- #6 hyperlaxit or laxit or unstab or instab or dislocat or luxat or subluxat or bankart
- #7 #4 or #5 or #6
- #8 #3 and #7

## *NHS Economic Evaluation Database: Issue 2 of 4, April 2015*

There are 7 results

Search Name: 2017\_7\_shoulder\_CLEED

Date Run: 29/05/17

ID Search

#1 MeSH descriptor: [Shoulder Joint] 1 tree(s) exploded

#2 glenohumer or shoulder

#3 #1 or #2

#4 MeSH descriptor: [Joint Instability] explode all trees

#5 MeSH descriptor: [Shoulder Dislocation] explode all trees

#6 hyperlaxit or laxit or unstab or instab or dislocat or luxat or sublaxat or bankart

#7 #4 or #5 or #6

#8 #3 and #7

### *Web of Science (Core Collection)*

TOPIC: (shoulder\* OR glenohumer\*) AND TOPIC: (hyperlaxit\* OR laxit\* OR unstab\* OR instab\* OR dislocat\* OR luxat\* OR sublaxat\* or bankart\*) AND TOPIC: ((systematic NEAR/3 (review\* OR overview\*)) OR meta-analys\* OR "meta analys\*" OR metaanalys\* OR "randomized controlled trial\*" OR "controlled clinical trial\*" OR "controlled trial\*")

Refined by: [excluding] DOCUMENT TYPES: ( EDITORIAL MATERIAL OR LETTER OR PROCEEDINGS PAPER OR MEETING ABSTRACT )

Timespan: All years. Indexes: SCI-EXPANDED, SSCI, A&HCI, ESCI.

### *Database - CINAHL*

Monday, May 29, 2017 8:53:34 AM

# Query Limiters/Expanders Last Run Via Results

S1 (MH "Shoulder Joint+") 2,400

S2 TI shoulder\* OR AB shoulder\* OR SU shoulder\* 15,943

S3 TI glenohumer\* OR AB glenohumer\* OR SU glenohumer\* 1,556

S4 (MH "Joint Instability+") 4,264

S5 (MH "Shoulder Dislocation") 693

S6 TI ( hyperlaxit\* or laxit\* or unstab\* or instab\* or dislocat\* or luxat\* or sublaxat\* or bankart\* ) OR AB ( hyperlaxit\* or laxit\* or unstab\* or instab\* or dislocat\* or luxat\* or sublaxat\* or bankart\* ) OR SU ( hyperlaxit\* or laxit\* or unstab\* or instab\* or dislocat\* or luxat\* or sublaxat\* or bankart\* ) 23,966

S7 S1 OR S2 OR S3 16,110

S8 S4 OR S5 OR S6 23,966

S9 S7 AND S8 2,575

S10 (MH "Meta Analysis") 19,108

S11 TX Meta analys\* OR TX Metaanalys\* 31,684

S12 (MH "Literature Review+") 35,029

S13 TX systematic N3 (review OR overview) 63,261

S14 S10 OR S11 OR S12 OR S13 80,982

S15 PT Commentary OR PT Letter OR PT Editorial OR (MH "Animals") 430,699

S16 S14 NOT S15 73,400

S17 S9 AND S16 88

Limiters: Source type "Magazines" excluded

## Scopus

```
(( TITLE-ABS-KEY ( shoulder* OR glenohumer* ) AND TITLE-ABS-KEY ( hyperlaxit* OR laxit* OR unstab* OR instab* OR dislocat* OR luxat* OR subluxat* OR bankart* )) AND ( ( TITLE-ABS-KEY ( systematic PRE/3 ( review* OR overview* ) ) OR TITLE-ABS-KEY ( meta-analys* ) OR TITLE-ABS-KEY ( "meta analys*" ) OR TITLE-ABS-KEY ( metaanalys* ) OR TITLE-ABS-KEY ( "randomi?ed controlled trial*" ) OR TITLE-ABS-KEY ( controlled PRE/3 trial* )) AND ( LIMIT-TO ( DOCTYPE , "ar" ) OR LIMIT-TO ( DOCTYPE , "re" ) OR LIMIT-TO ( DOCTYPE , "ip" ) OR LIMIT-TO ( DOCTYPE , "er" ) ) )
```

## Embase

Search Strategy from ProQuest Dialog

June 05 2017 06:14

---

### Search Strategy

Databases: Embase®

| Set# | Searched for                                                                                                                                                                                                 | Results |
|------|--------------------------------------------------------------------------------------------------------------------------------------------------------------------------------------------------------------|---------|
| S1   | (EMB.EXACT.EXPLODE("shoulder dislocation")) OR ((shoulder* OR glenohumer*) AND (hyperlaxit* OR laxit* OR unstab* OR instab* OR dislocat* OR luxat* OR subluxat* OR bankart*))                                | 15440   |
| S2   | ((EMB.EXACT.EXPLODE("shoulder dislocation")) OR ((shoulder* OR glenohumer*) AND (hyperlaxit* OR laxit* OR unstab* OR instab* OR dislocat* OR luxat* OR subluxat* OR bankart*))) and (dstat.exact("MEDLINE")) | 10822   |
| S3   | (S1 NOT S2) AND (meta-analy* or metaanal* or systemat* or random* or rct or cct or (control* NEAR/3 trial*))                                                                                                 | 312°    |

° Duplicates are removed from the search and from the result count.
