# Supplementary material for: Treatment after traumatic shoulder dislocation: a systematic review with a network meta-analysis
Source: PubMed Central journal article supplement — Br J Sports Med. 2018 Jun 23;52(23):1498–506. doi: 10.1136/bjsports-2017-098539 (PMC6241619; doi:10.1136/bjsports-2017-098539), 2018-06-23
Supplement: bjsports-2017-098539supp002.pdf [file bjsports-2017-098539supp002.pdf]

```
library(netmeta)
library(rmeta)
```

```
studies <- c("Jakobsen 2007", "Kirkley 1999", "Robinson 2008", "Wintzell 1999")
treat1 <- c(rep("Labrum repair",3),"Lavage")
treat2 <- c("Lavage", "NOM", "Lavage", "NOM")
x1 <- c(1,1,2,4)
n1 <- c(37,19,42,30)
x2 <- c(13,8,6,13)
n2 <- c(39,19,42,30)
```

```
#12 months analysis with RR
```

```
data <- pairwise(treat=list(treat1, treat2),
  event=list(x1,x2),
  n=list(n1,n2), sm="RR")
```

```
net12 <- netmeta(TE, seTE,treat1,treat2,studlab=studies,data=data,comb.random=T, sm="RR")
print(net12,logscale=T)
net12$pval.random
```

```
#24 months analysis with RR
```

```
x1 <- c(1,3,3,3)
n1 <- c(37,19,42,15)
x2 <- c(21,9,12,9)
n2 <- c(39,19,42,15)
```

```
data24 <- pairwise(treat=list(treat1, treat2),
  event=list(x1,x2),
  n=list(n1,n2), sm="RR")
```

```
net24 <- netmeta(TE, seTE,treat1,treat2,studlab=studies,data=data24,comb.random=T, sm="RR")
print(net24,logscale=T)
net24$pval.random
```

```
#Forestplot 12 months
```

```
mid <- c(NA,0.08,0.23,0.34)
up <- c(NA,0.27,0.67,0.86)
low <- c(NA,0.02,0.08,0.14)
```

```
midlog <- c(NA,-2.53,-1.46,-1.06)
```

```
uplog <- c(NA,-1.29,-0.39,-0.15)
lowlog <- c(NA,-3.76,-2.53,-1.98)
```

```
text <- cbind(c("Treatment 1", "Labrum repair", "Labrum repair", "Lavage"),
             c(" ", rep("vs",3)),
             c("Treatment 2", "NOM", "Lavage", "NOM"),
             c("Relative risk (95-% CI)", paste0(mid[-1], " (", low[-1], " , ", up[-1], ")")),
             c("P-value", "<0.001", "0.007", "0.023" ))
```

```
pdf(paste0(getwd(), "/Forest12_2017MAY.pdf"), paper="a4", fontsize=9, colormodel="gray")
forestplot(text, (midlog), (lowlog), (uplog), clip=c(-4,4), zero=0, graphwidth = unit(1.2, "inches"),
           boxsize=0.3, is.summary= c(T, rep(F,3)), xticks=c(0.01,0.1,1,10), xlog=T)
dev.off()
```

```
#Forestplot 24 months
mid <- c(NA,0.15,0.21,0.71)
up <- c(NA,0.80,0.91,3.68)
low <- c(NA,0.03,0.05,0.14)
```

```
midlog <- c(NA,-1.88,-1.54,-0.34)
uplog <- c(NA,-0.23,-0.09,1.30)
lowlog <- c(NA,-3.53,-2.98,-1.98)
```

```
text <- cbind(c("Treatment 1", "Labrum repair", "Labrum repair", "Lavage"),
             c(" ", rep("vs",3)),
             c("Treatment 2", "NOM", "Lavage", "NOM"),
             c("Relative risk (95-% CI)", paste0(mid[-1], " (", low[-1], " , ", up[-1], ")")),
             c("P-value", "0.026", "0.037", "0.686" ))
```

```
pdf(paste0(getwd(), "/Forest24_2017MAY.pdf"), paper="a4", fontsize=9, colormodel="gray")
forestplot(text, (midlog), (lowlog), (uplog), clip=c(-5,5), zero=0, graphwidth = unit(1.8, "inches"),
           boxsize=0.3, is.summary= c(T, rep(F,3)), xticks=c(0.01,0.1,1,10), xlog=T)
dev.off()
```

```
?forestplot
log(mid)
```

```
#Netheat
pdf(paste0(getwd(), "/netheat12_2017MAY.pdf"), paper="a4", fontsize=10) #, colormodel="gray")
netheat(net12, random=T)
dev.off()
```

```
pdf(paste0(getwd(), "/netheat24_2017MAY.pdf"), paper="a4", fontsize=10) #, colormodel="gray")
netheat(net24, random=T)
dev.off()
```

```
LabrumN <- 37 + 19 + 42
lavageN12 <- 39 + 42 + 30
lavageN24 <- 39 + 42 + 15
NOMN12 <- 19 + 15 + 30
NOMN24 <- 19 + 15 + 15
```

```
LabrumLavagek <- 2
LabrumNOMk <- 1
LavageNOMk <- 1
```

```
#Netgraph
```

```
pdf(paste0(getwd(), "/netgraph12_2017MAY.pdf"), paper="a4", fontsize=10, colormodel="gray")
netgraph(net12, plastic=F, thickness="number.of.studies", col="black", offset=0.1, points=T, lwd=3,
         cex.points=c(111,49,98)/15, col.points="black")
text(-0.4, 0, "k=2", cex = .8)
text(0.2, -0.3, "k=1", cex = .8)
text(0.2, 0.3, "k=1", cex = .8)
text(-0.6, 0.6, paste0("N=", LabrumN), cex = .8)
text(-0.48, -0.60, paste0("N=", lavageN12), cex = .8)
text(0.64, -0.09, paste0("N=", NOMN12), cex = .8)
dev.off()
```

```
#Netgraph
```

```
pdf(paste0(getwd(), "/netgraph24_2017MAY.pdf"), paper="a4", fontsize=10, colormodel="gray")
netgraph(net24, plastic=F, thickness="number.of.studies", col="black", offset=0.1, points=T, lwd=3,
         cex.points=c(111,49,98)/15, col.points="black")
text(-0.4, 0, "k=2", cex = .8)
text(0.2, -0.3, "k=1", cex = .8)
text(0.2, 0.3, "k=1", cex = .8)
text(-0.6, 0.6, paste0("N=", LabrumN), cex = .8)
text(-0.48, -0.60, paste0("N=", lavageN24), cex = .8)
text(0.64, -0.09, paste0("N=", NOMN24), cex = .8)
dev.off()
```
