# Supplementary material for: Treatment after traumatic shoulder dislocation: a systematic review with a network meta-analysis
Source: PubMed Central journal article supplement — Br J Sports Med. 2018 Jun 23;52(23):1498–506. doi: 10.1136/bjsports-2017-098539 (PMC6241619; doi:10.1136/bjsports-2017-098539), 2018-06-23
Supplement: bjsports-2017-098539supp011.pdf [file bjsports-2017-098539supp011.pdf]

**Appendix Table 1: Studies excluded by review of full text and the main reason for exclusion**

|              |           |                                                                                                                                           |
|--------------|-----------|-------------------------------------------------------------------------------------------------------------------------------------------|
| Hovellius    | 1983-2016 | 7 publications*, Quasi-RCT, de facto a prospective cohort, an additional post-randomization third group formed from noncompliant patients |
| Arciero      | 1994      | Nonrandomized                                                                                                                             |
| Wintzell     | 1996      | Preliminary study, the population is part of Wintzell 1999 and 2y report is Wintzell 1999b                                                |
| Geiger       | 1997      | Nonrandomized                                                                                                                             |
| Hovellius    | 1999      | Instructional lecture                                                                                                                     |
| Jorgensen    | 1999      | Nonrandomized                                                                                                                             |
| Cole         | 2000      | Nonrandomized                                                                                                                             |
| Gartsman     | 2001      | Nonrandomized                                                                                                                             |
| Bottoni      | 2002      | Quasi-RCT (additionally a composite outcome of "failure", which includes a decision to perform surgery)                                   |
| Edmonds      | 2003      | A sub-sample from Kirkleys's trial. Too short follow-up.                                                                                  |
| Bottoni      | 2006      | Mixed population**                                                                                                                        |
| Rhee         | 2007      | Nonrandomized                                                                                                                             |
| Hiemstra     | 2008      | Not a proper RCT, but a sub-sample of an RCT                                                                                              |
| Cox          | 2008      | Review article                                                                                                                            |
| Scheibel     | 2009      | Nonrandomized                                                                                                                             |
| Taskoparan   | 2010      | Too short follow-up                                                                                                                       |
| Mahirogullar | 2010      | Retrospective study                                                                                                                       |
| Kruger       | 2011      | Mixed population**                                                                                                                        |
| Arliani      | 2011      | Review article                                                                                                                            |
| Ismail       | 2014      | Too short follow-up                                                                                                                       |
| Owens        | 2015      | Subluxations only as the primary "incident"                                                                                               |
| Damkjaer     | 2015      | Nonrandomized                                                                                                                             |
| McRae        | 2016      | Mixed population**                                                                                                                        |
| Virk         | 2016      | Nonrandomized                                                                                                                             |
| Nourissat    | 2016      | Nonrandomized                                                                                                                             |
| Ko           | 2016      | Postoperative reinstability                                                                                                               |
| Uchiyama     | 2017      | Nonrandomized                                                                                                                             |
| Zhang        | 2017      | Nonrandomized                                                                                                                             |

\* Three found in our systematic review search and four identified from references

\*\* mixed population = includes both traumatic and nontraumatic dislocations
