# Supplementary material for: Treatment after traumatic shoulder dislocation: a systematic review with a network meta-analysis
Source: PubMed Central journal article supplement — Br J Sports Med. 2018 Jun 23;52(23):1498–506. doi: 10.1136/bjsports-2017-098539 (PMC6241619; doi:10.1136/bjsports-2017-098539), 2018-06-23
Supplement: bjsports-2017-098539supp012.pdf [file bjsports-2017-098539supp012.pdf]

Appendix Table 2. Identified unpublished trials

| Author, Country                                                                           | Title                                                                                                              | Registration number | Study type | Intervention                | Control                    | Target sample size | Primary outcome measure | Secondary outcome measures                                                  | Query result*                    | Conference abstract only | Recruitment completed | Estimated completion date |
|-------------------------------------------------------------------------------------------|--------------------------------------------------------------------------------------------------------------------|---------------------|------------|-----------------------------|----------------------------|--------------------|-------------------------|-----------------------------------------------------------------------------|----------------------------------|--------------------------|-----------------------|---------------------------|
| <b>First-time traumatic shoulder dislocation</b>                                          |                                                                                                                    |                     |            |                             |                            |                    |                         |                                                                             |                                  |                          |                       |                           |
| Sandow, M. 1996<br>USA                                                                    | Acute arthroscopic Bankart repair for initial anterior shoulder dislocation: A prospective clinical trial          | Not registered      | RCT        | Arthroscopic Bankart repair | Immobilization for 4 weeks | 39                 | Redislocation rate      | Recurrent instability, return to sports, strength testing (Cybex)           | Not published                    | X                        |                       |                           |
| Miller, BS. 2007<br>UK                                                                    | Sling vs external rotation brace for shoulder dislocations: preliminary results of a randomized trial              | Not registered      | RCT        | Immobilization in ER        | Immobilization in IR       | 30                 | Redislocation rate      | WOSI, ASES, symptom questionnaire                                           | Not published                    | X                        |                       |                           |
| Kelly, CP. 2011<br>UK                                                                     | External rotation bracing compared to conventional sling in first time anterior shoulder dislocation               | Not registered      | RCT        | Immobilization in ER        | Immobilization in IR       | 72                 | Compliance              | Patient satisfaction, redislocation rate, OIS                               | No contact information available | X                        |                       |                           |
| McCarty, EC.<br>USA                                                                       | Immobilization in External Rotation After First Time Anterior Shoulder Dislocation                                 | NCT00707018         | RCT        | Immobilization in ER        | Immobilization in IR       | 50                 | Recurrent instability   | Participant self-reported outcome measures, time to return to work or sport | No contact information available |                          | X                     | 2012                      |
| Nicolaou, N.<br>UK                                                                        | Splintage In External Rotation For Anterior Glenohumeral Dislocation: A Prospective, Randomised & Controlled Study | ISRCTN41070054      | RCT        | Immobilization in ER        | Immobilization in IR       | 50                 | Redislocation rate      | Not reported                                                                | Not published                    | X                        | X                     | 2010                      |
| Pimpalnerkar, A.<br>UK                                                                    | A comparison study of internal versus external rotation immobilisation for primary anterior shoulder dislocation   | ISRCTN48254181      | RCT        | Immobilization in ER        | Immobilization in IR       | 150                | Recurrence              | Not reported                                                                | No response                      |                          | X                     | 2008                      |
| We tried to contact the authors to inquire the possible publication and data of the study |                                                                                                                    |                     |            |                             |                            |                    |                         |                                                                             |                                  |                          |                       |                           |
| <b>Abbreviations</b>                                                                      |                                                                                                                    |                     |            |                             |                            |                    |                         |                                                                             |                                  |                          |                       |                           |
| ASES - American Shoulder and Elbow Shoulder Score                                         |                                                                                                                    |                     |            |                             |                            |                    |                         |                                                                             |                                  |                          |                       |                           |
| ER - External rotation                                                                    |                                                                                                                    |                     |            |                             |                            |                    |                         |                                                                             |                                  |                          |                       |                           |
| IR - Internal rotation                                                                    |                                                                                                                    |                     |            |                             |                            |                    |                         |                                                                             |                                  |                          |                       |                           |
| OIS - Oxford Instability Shoulder Score                                                   |                                                                                                                    |                     |            |                             |                            |                    |                         |                                                                             |                                  |                          |                       |                           |
| RCT - Randomized Controlled Trials                                                        |                                                                                                                    |                     |            |                             |                            |                    |                         |                                                                             |                                  |                          |                       |                           |
| WOSI - Western Ontario Shoulder Instability Index                                         |                                                                                                                    |                     |            |                             |                            |                    |                         |                                                                             |                                  |                          |                       |                           |
| Last update (ICTRP): 23.1.2018                                                            |                                                                                                                    |                     |            |                             |                            |                    |                         |                                                                             |                                  |                          |                       |                           |
