# Supplementary material for: Treatment after traumatic shoulder dislocation: a systematic review with a network meta-analysis
Source: PubMed Central journal article supplement — Br J Sports Med. 2018 Jun 23;52(23):1498–506. doi: 10.1136/bjsports-2017-098539 (PMC6241619; doi:10.1136/bjsports-2017-098539), 2018-06-23
Supplement: bjsports-2017-098539supp013.pdf [file bjsports-2017-098539supp013.pdf]

Appendix Table 3. On-going randomized controlled trials registered in the International Clinical Trials Registry Platform

| Author, Country                                             | Title                                                                                                                                                                                                                 | Registration number  | Study type | Sponsorship                | Intervention                                                        | Control                                                                        | Target sample size    | Primary outcome measure                         | Secondary outcome measures                                                                                                                                                                        | Recruitment completed | Recruiting | Not yet recruiting | Status unknown               | Estimated completion date             |
|-------------------------------------------------------------|-----------------------------------------------------------------------------------------------------------------------------------------------------------------------------------------------------------------------|----------------------|------------|----------------------------|---------------------------------------------------------------------|--------------------------------------------------------------------------------|-----------------------|-------------------------------------------------|---------------------------------------------------------------------------------------------------------------------------------------------------------------------------------------------------|-----------------------|------------|--------------------|------------------------------|---------------------------------------|
| <b>First-time traumatic shoulder dislocation</b>            |                                                                                                                                                                                                                       |                      |            |                            |                                                                     |                                                                                |                       |                                                 |                                                                                                                                                                                                   |                       |            |                    |                              |                                       |
| Bell, S<br>Australia                                        | The efficacy of 2 alternative suture materials Ethibond and Parsylok used with Parslok 'suture anchors' for the primary open surgical stabilisation of the shoulder for instability - a double blind randomised trial | ACTRN1260600196549   | RCT        | Industry                   | Open Bankart repair with bioabsorbable suture material              | Open Bankart repair with non-absorbable suture material                        | 236                   | Recurrent instability                           | Risk factors for recurrent instability                                                                                                                                                            |                       | X          |                    |                              | Not reported (recruitment since 2006) |
| Johnson, A<br>Australia                                     | A comparison of conservative management with external rotation bracing versus arthroscopic surgical treatment for shoulder dislocation in young people                                                                | ACTRN12612000442808  | RCT        | Academic                   | Immobilization in ER                                                | Arthroscopic Bankart repair                                                    | 50                    | WOSI                                            | Redislocation rate, EQ-5D, ASES, Quick-DASH, Pain VAS, Patient satisfaction, Compliance                                                                                                           |                       |            | X                  |                              | Not reported                          |
| Litchfield, R<br>Canada                                     | The Role of Rotator Interval Closure in Bankart Lesion Repair                                                                                                                                                         | NCT01620619          | RCT        | Academic                   | Arthroscopic Bankart repair and rotator interval closing            | Arthroscopic Bankart repair                                                    | 142                   | WOSI                                            | ROM, Pain, Upper extremity functional index, redislocation                                                                                                                                        |                       |            |                    | X                            | May 2016                              |
| Pelet, S<br>Canada                                          | First Time Anterior Glenohumeral Joint Dislocation With a Bankart Lesion in Young Patients: Which Type of Immobilization Should be Chosen? A Prospective Randomized Study                                             | NCT01111500          | RCT        | Academic                   | Immobilization in ER                                                | Immobilization in IR                                                           | 50                    | Anatomical healing of labrum (MRI)              | Relapse rate                                                                                                                                                                                      |                       | X          |                    |                              | February 2015                         |
| Pougès, C<br>France                                         | First Episode of Anterior Glenohumeral Dislocation in Adult Patients Under 25 Years of Age: Anterior Capsulo labral Reinsertion by Arthroscopic Approach Versus Immobilization                                        | NCT03315819          | RCT        | Academic                   | Arthroscopic Bankart repair                                         | Immobilization in internal rotation (Dujarrier) for 3 weeks and rehabilitation | 40                    | Occurrence of recurrence at 2 years             | Recurrent instability (dislocation or subluxation), WDS, DASH, WOSI, Satisfaction (Likert), work stoppage, return to sports                                                                       |                       | X          |                    |                              | March 2018                            |
| Senthikumar, S.<br>UK                                       | Get them moving early: sling immobilisation following arthroscopic anterior shoulder stabilisation offers no advantage                                                                                                | ISRCTN13628010       | RCT        | Academic                   | Early mobilization after arthroscopic Bankart repair                | Immobilization for 6 weeks after arthroscopic Bankart repair                   | 60 (stopped after 28) | Failure of surgery (dislocation or subluxation) | OSIS                                                                                                                                                                                              | X                     |            |                    |                              | November 2017                         |
| Walker, T<br>Australia                                      | A randomised controlled trial on the effect of Physiotherapy and an external rotation brace in the management of first time anterior shoulder dislocations in patients aged 15-40 years                               | ACTRN12611001183976  | RCT        | Other collaborative groups | Immobilization in ER and physiotherapy                              | Immobilization in ER and different type of physiotherapy                       | 200                   | Redislocation rate                              | DASH, OSIS                                                                                                                                                                                        |                       | X          |                    |                              | February 2019                         |
| Whelan, DB<br>Canada                                        | A Randomized Evaluation of Emergent Immobilization in External Rotation in the Management of Acute Anterior Dislocations of the Shoulder (EERAADS)                                                                    | NCT02197819          | RCT        | Academic                   | Immobilization in ER                                                | Immobilization in IR                                                           | 75                    | Redislocation rate                              | Not reported                                                                                                                                                                                      |                       | X          |                    |                              |                                       |
| <b>Chronic post-Traumatic shoulder instability</b>          |                                                                                                                                                                                                                       |                      |            |                            |                                                                     |                                                                                |                       |                                                 |                                                                                                                                                                                                   |                       |            |                    |                              |                                       |
| Caiqi, X<br>China                                           | Four-in-one procedures for anterior shoulder instability: conjoint tendon transfer versus long head of biceps transfer                                                                                                | CHCTR-IOR-17010736   | RCT        | Academic                   | LHBT Transfer with Bankart repair                                   | Conjoiden Tendon transfer with Bankart repair                                  | 120                   | Rowe-Oxford Score                               | Shoulder Stability Score, Throwing ability, CT Evaluation                                                                                                                                         |                       | X          |                    |                              | February 2020                         |
| Elamo, SP<br>Finland                                        | Operative Treatment of Traumatic Anterior/Inferior Shoulder Instability in Young Male Patients                                                                                                                        | NCT01998048          | RCT        | Academic                   | Arthroscopic Bankart repair                                         | Open Latarjet                                                                  | 120                   | Recurrent instability                           | Sports activity, Shoulder condition VAS, Constant score, OSIS, SSV                                                                                                                                |                       | X          |                    |                              | December 2017                         |
| Eshoj, H<br>Denmark                                         | A Neuromuscular Exercise Program for Patients With Anterior Shoulder Instability (SINEX)                                                                                                                              | NCT02371928          | RCT        | Academic                   | Neuromuscular exercise program                                      | Standard home exercise program                                                 | 80                    | WOSI                                            | EQ-5D, Tampa Scale of Kinesiophobia, Patient Specific Functioning Scale, Global Perceived Effect, Constant score, Shoulder instability in clinical testing, Joint proprioceptive, adverse effects |                       | X          | X                  | (Active, but not recruiting) | June 2019                             |
| Fenglong, L<br>China                                        | Application of the Arthroscopic Coracoid Transfer (Arthroscopic Latarjet Procedure) in Treating Recurrent Anterior Shoulder Instability                                                                               | CHCTR-INR-17013927   | RCT        | Academic                   | Arthroscopic Latarjet                                               | Open Latarjet                                                                  | 60                    | Dislocation rate                                | Not reported                                                                                                                                                                                      |                       | X          |                    |                              | Not reported                          |
| Ferreira, A<br>Brazil                                       | Arthroscopic Treatment of Anterior Shoulder Dislocation Using Knotted and Knotless Anchors                                                                                                                            | NCT02535585          | RCT        | Academic                   | Arthroscopic Bankart repair with knotted suture anchors (SutureTak) | Arthroscopic Bankart repair with knotless suture anchors (Pushlock)            | 54                    | Rowe scale                                      | Redislocation rate, Complications, WOSI, ASES, MRI                                                                                                                                                |                       | X          |                    |                              | April 2019                            |
| Qalil, H<br>Egypt                                           | Latarjet procedure with or without remplissage for treatment of patients with recurrent anterior shoulder dislocation                                                                                                 | PACTR201702001989912 | RCT        | Academic                   | Latarjet                                                            | Latarjet with remplissage                                                      | 60                    | OSIS                                            | Constant score, arthropathy (Samilson-Prieto), VAS (pain)                                                                                                                                         |                       | X          |                    |                              | June 2018                             |
| Lapner, P<br>Canada                                         | Approach to Shoulder Instability                                                                                                                                                                                      | NCT02060227          | RCT        | Academic                   | Arthroscopic Bankart repair                                         | Open Latarjet                                                                  | 120                   | WOSI                                            | ASES                                                                                                                                                                                              |                       | X          |                    |                              | December 2018                         |
| Li, F<br>China                                              | Open Latarjet Techniques Versus Arthroscopic Latarjet Techniques on Anterior Shoulder Instability: The Comparison of Clinical and Radiographic Outcomes                                                               | NCT01912027          | RCT        | Academic                   | Arthroscopic Latarjet                                               | Open Latarjet                                                                  | 30                    | ROM                                             | VAS, UCLA, Constant score, ASES, SST, Radiographic evaluation                                                                                                                                     |                       |            |                    | X                            | May 2014                              |
| MacDonald, PB<br>Canada                                     | Arthroscopic Bankart Repair With and Without Remplissage in Anterior Shoulder Instability                                                                                                                             | NCT01324531          | RCT        | Academic                   | Arthroscopic Bankart repair                                         | Arthroscopic Bankart repair with remplissage                                   | 150                   | WOSI                                            | SST, ASES, Ultrasound to assess healing of the tissue                                                                                                                                             |                       |            | X                  | (Active, but not recruiting) | December 2019                         |
| Maman, E<br>Israel                                          | Arthroscopic Rotator Interval Closure in Shoulder Instability Repair                                                                                                                                                  | NCT00901797          | RCT        | Academic                   | Arthroscopic Bankart repair                                         | Arthroscopic Bankart repair and rotator interval closing                       | 100                   | Recurrent instability                           | ROM, Activity level, Revision surgery, Pain                                                                                                                                                       |                       |            |                    | X                            | May 2011                              |
| Moroder, P<br>Austria                                       | J-bone graft versus Latarjet                                                                                                                                                                                          | ISRCTN85986529       | RCT        | Academic                   | Open Latarjet                                                       | Open J-Bone graft                                                              | 60                    | WOSI                                            | Resorption of grafts, Subjective Shoulder value VAS, Rowe Score, osteoarthritis in X-ray                                                                                                          | X                     |            |                    |                              | March 2024                            |
| Wong, I<br>Canada                                           | The Arthroscopic Treatment of Recurrent Anterior Shoulder Instability (ATRASI)                                                                                                                                        | NCT02510625          | RCT        | Academic                   | Arthroscopic Bankart repair                                         | Arthroscopic Anatomic Glenoid Reconstruction                                   | 200                   | WOSI                                            | Recurrent instability                                                                                                                                                                             |                       | X          |                    |                              | September 2022                        |
| <b>Abbreviations</b>                                        |                                                                                                                                                                                                                       |                      |            |                            |                                                                     |                                                                                |                       |                                                 |                                                                                                                                                                                                   |                       |            |                    |                              |                                       |
| ASES - American Shoulder and Elbow Shoulder Score           |                                                                                                                                                                                                                       |                      |            |                            |                                                                     |                                                                                |                       |                                                 |                                                                                                                                                                                                   |                       |            |                    |                              |                                       |
| DASH - Disabilities of Shoulder and Hand                    |                                                                                                                                                                                                                       |                      |            |                            |                                                                     |                                                                                |                       |                                                 |                                                                                                                                                                                                   |                       |            |                    |                              |                                       |
| EQ - Euro Quality of Life                                   |                                                                                                                                                                                                                       |                      |            |                            |                                                                     |                                                                                |                       |                                                 |                                                                                                                                                                                                   |                       |            |                    |                              |                                       |
| ER - External Rotation                                      |                                                                                                                                                                                                                       |                      |            |                            |                                                                     |                                                                                |                       |                                                 |                                                                                                                                                                                                   |                       |            |                    |                              |                                       |
| IR - Internal Rotation                                      |                                                                                                                                                                                                                       |                      |            |                            |                                                                     |                                                                                |                       |                                                 |                                                                                                                                                                                                   |                       |            |                    |                              |                                       |
| MRI - Magnetic Resonance Imaging                            |                                                                                                                                                                                                                       |                      |            |                            |                                                                     |                                                                                |                       |                                                 |                                                                                                                                                                                                   |                       |            |                    |                              |                                       |
| OSIS - Oxford Shoulder Instability Index                    |                                                                                                                                                                                                                       |                      |            |                            |                                                                     |                                                                                |                       |                                                 |                                                                                                                                                                                                   |                       |            |                    |                              |                                       |
| RCT - Randomized Controlled Trial                           |                                                                                                                                                                                                                       |                      |            |                            |                                                                     |                                                                                |                       |                                                 |                                                                                                                                                                                                   |                       |            |                    |                              |                                       |
| SST - Simple Shoulder Test                                  |                                                                                                                                                                                                                       |                      |            |                            |                                                                     |                                                                                |                       |                                                 |                                                                                                                                                                                                   |                       |            |                    |                              |                                       |
| SSV - Subjective Shoulder Value                             |                                                                                                                                                                                                                       |                      |            |                            |                                                                     |                                                                                |                       |                                                 |                                                                                                                                                                                                   |                       |            |                    |                              |                                       |
| UCLA - University of California, Los Angeles Shoulder Score |                                                                                                                                                                                                                       |                      |            |                            |                                                                     |                                                                                |                       |                                                 |                                                                                                                                                                                                   |                       |            |                    |                              |                                       |
| VAS - Visual Analog Scale                                   |                                                                                                                                                                                                                       |                      |            |                            |                                                                     |                                                                                |                       |                                                 |                                                                                                                                                                                                   |                       |            |                    |                              |                                       |
| WDS - Walch Duplay Score                                    |                                                                                                                                                                                                                       |                      |            |                            |                                                                     |                                                                                |                       |                                                 |                                                                                                                                                                                                   |                       |            |                    |                              |                                       |
| WOSI - Western Ontario Shoulder Instability Index           |                                                                                                                                                                                                                       |                      |            |                            |                                                                     |                                                                                |                       |                                                 |                                                                                                                                                                                                   |                       |            |                    |                              |                                       |
| Last update (ICTRP): 23.1.2018                              |                                                                                                                                                                                                                       |                      |            |                            |                                                                     |                                                                                |                       |                                                 |                                                                                                                                                                                                   |                       |            |                    |                              |                                       |
