# Supplementary material for: Treatment after traumatic shoulder dislocation: a systematic review with a network meta-analysis
Source: PubMed Central journal article supplement — Br J Sports Med. 2018 Jun 23;52(23):1498–506. doi: 10.1136/bjsports-2017-098539 (PMC6241619; doi:10.1136/bjsports-2017-098539), 2018-06-23
Supplement: bjsports-2017-098539supp014.pdf [file bjsports-2017-098539supp014.pdf]

| Project Name | Project ID | Project Lead | Project Manager | Project Sponsor | Project Description   | Project Objectives   | Project Scope   | Project Budget   | Project Risk   | Project Status   | Project Start Date | Project End Date | Project Duration | Project Progress | Project Deliverables   | Project Milestones   | Project Risks   | Project Issues   | Project Change Log   | Project Communication   | Project Reporting   | Project Documentation   | Project Archiving   |
|--------------|------------|--------------|-----------------|-----------------|-----------------------|----------------------|-----------------|------------------|----------------|------------------|--------------------|------------------|------------------|------------------|------------------------|----------------------|-----------------|------------------|----------------------|-------------------------|---------------------|-------------------------|---------------------|
| Project A    | 001        | John Doe     | Jane Smith      | Bob Johnson     | Project A Description | Project A Objectives | Project A Scope | Project A Budget | Project A Risk | Project A Status | 2023-01-01         | 2023-03-31       | 90 Days          | 80%              | Project A Deliverables | Project A Milestones | Project A Risks | Project A Issues | Project A Change Log | Project A Communication | Project A Reporting | Project A Documentation | Project A Archiving |
| Project B    | 002        | Jane Smith   | John Doe        | Bob Johnson     | Project B Description | Project B Objectives | Project B Scope | Project B Budget | Project B Risk | Project B Status | 2023-02-01         | 2023-04-30       | 90 Days          | 70%              | Project B Deliverables | Project B Milestones | Project B Risks | Project B Issues | Project B Change Log | Project B Communication | Project B Reporting | Project B Documentation | Project B Archiving |
| Project C    | 003        | Bob Johnson  | Jane Smith      | John Doe        | Project C Description | Project C Objectives | Project C Scope | Project C Budget | Project C Risk | Project C Status | 2023-03-01         | 2023-05-31       | 90 Days          | 60%              | Project C Deliverables | Project C Milestones | Project C Risks | Project C Issues | Project C Change Log | Project C Communication | Project C Reporting | Project C Documentation | Project C Archiving |
| Project D    | 004        | John Doe     | Bob Johnson     | Jane Smith      | Project D Description | Project D Objectives | Project D Scope | Project D Budget | Project D Risk | Project D Status | 2023-04-01         | 2023-06-30       | 90 Days          | 50%              | Project D Deliverables | Project D Milestones | Project D Risks | Project D Issues | Project D Change Log | Project D Communication | Project D Reporting | Project D Documentation | Project D Archiving |
| Project E    | 005        | Jane Smith   | John Doe        | Bob Johnson     | Project E Description | Project E Objectives | Project E Scope | Project E Budget | Project E Risk | Project E Status | 2023-05-01         | 2023-07-31       | 90 Days          | 40%              | Project E Deliverables | Project E Milestones | Project E Risks | Project E Issues | Project E Change Log | Project E Communication | Project E Reporting | Project E Documentation | Project E Archiving |
| Project F    | 006        | Bob Johnson  | Jane Smith      | John Doe        | Project F Description | Project F Objectives | Project F Scope | Project F Budget | Project F Risk | Project F Status | 2023-06-01         | 2023-08-31       | 90 Days          | 30%              | Project F Deliverables | Project F Milestones | Project F Risks | Project F Issues | Project F Change Log | Project F Communication | Project F Reporting | Project F Documentation | Project F Archiving |
| Project G    | 007        | John Doe     | Bob Johnson     | Jane Smith      | Project G Description | Project G Objectives | Project G Scope | Project G Budget | Project G Risk | Project G Status | 2023-07-01         | 2023-09-30       | 90 Days          | 20%              | Project G Deliverables | Project G Milestones | Project G Risks | Project G Issues | Project G Change Log | Project G Communication | Project G Reporting | Project G Documentation | Project G Archiving |
| Project H    | 008        | Jane Smith   | John Doe        | Bob Johnson     | Project H Description | Project H Objectives | Project H Scope | Project H Budget | Project H Risk | Project H Status | 2023-08-01         | 2023-10-31       | 90 Days          | 10%              | Project H Deliverables | Project H Milestones | Project H Risks | Project H Issues | Project H Change Log | Project H Communication | Project H Reporting | Project H Documentation | Project H Archiving |
| Project I    | 009        | Bob Johnson  | Jane Smith      | John Doe        | Project I Description | Project I Objectives | Project I Scope | Project I Budget | Project I Risk | Project I Status | 2023-09-01         | 2023-11-30       | 90 Days          | 5%               | Project I Deliverables | Project I Milestones | Project I Risks | Project I Issues | Project I Change Log | Project I Communication | Project I Reporting | Project I Documentation | Project I Archiving |
| Project J    | 010        | John Doe     | Bob Johnson     | Jane Smith      | Project J Description | Project J Objectives | Project J Scope | Project J Budget | Project J Risk | Project J Status | 2023-10-01         | 2024-01-31       | 90 Days          | 0%               | Project J Deliverables | Project J Milestones | Project J Risks | Project J Issues | Project J Change Log | Project J Communication | Project J Reporting | Project J Documentation | Project J Archiving |
