# Supplementary material for: Treatment after traumatic shoulder dislocation: a systematic review with a network meta-analysis
Source: PubMed Central journal article supplement — Br J Sports Med. 2018 Jun 23;52(23):1498–506. doi: 10.1136/bjsports-2017-098539 (PMC6241619; doi:10.1136/bjsports-2017-098539), 2018-06-23
Supplement: bjsports-2017-098539supp015.pdf [file bjsports-2017-098539supp015.pdf]

| Appendix Table 5. Results of included studies                                                                                           | Primary outcomes (if defined)                                                                                                                                                                                                                                                                                                                                                                                                                                                                                                                                                                                                                                                                                                                                  | Secondary outcome                                                                                                                                                                                                                                                                                                                                                                                                                                                                                                                                                                                                                                                                                                                                                                                                                                                                                                                                                                                                                                                                                                                                                                                                                                                 | Harms                                                                                                                                                                                                                                                                                                          | Comments                                                                                                                                                                                                  |
|-----------------------------------------------------------------------------------------------------------------------------------------|----------------------------------------------------------------------------------------------------------------------------------------------------------------------------------------------------------------------------------------------------------------------------------------------------------------------------------------------------------------------------------------------------------------------------------------------------------------------------------------------------------------------------------------------------------------------------------------------------------------------------------------------------------------------------------------------------------------------------------------------------------------|-------------------------------------------------------------------------------------------------------------------------------------------------------------------------------------------------------------------------------------------------------------------------------------------------------------------------------------------------------------------------------------------------------------------------------------------------------------------------------------------------------------------------------------------------------------------------------------------------------------------------------------------------------------------------------------------------------------------------------------------------------------------------------------------------------------------------------------------------------------------------------------------------------------------------------------------------------------------------------------------------------------------------------------------------------------------------------------------------------------------------------------------------------------------------------------------------------------------------------------------------------------------|----------------------------------------------------------------------------------------------------------------------------------------------------------------------------------------------------------------------------------------------------------------------------------------------------------------|-----------------------------------------------------------------------------------------------------------------------------------------------------------------------------------------------------------|
| <b>First-time traumatic shoulder dislocation</b><br><b>Early surgery</b><br>Kirilley, A. (I) 1999 (4), (R) 2005 (15), Canada            | (II) Mean WOSI (%) at five years (79 months) [CI 95%]: Intervention: 86%; Control: 74.8% (-5.8% to 87%)<br>No statistically significant differences between groups                                                                                                                                                                                                                                                                                                                                                                                                                                                                                                                                                                                             | (I) Redlocation rate at two years:<br>Intervention: 9/19 (47%); Control: 9/19 (47%)<br>Statistical difference between groups, P=0.03<br>Recurrence instability rate: Intervention: 5/19 (26%); Control: 16/19 (84%)<br>Mean WOSI (%) at two years (23-87 months) [95% CI for between groups difference]: Intervention: 86.3; Control: 69.8 (11.6 to 111.2)<br>Between groups difference, P=0.03, clinically relevant (MCGI = 10%)<br>(II) Mean ASES (79 months) [95% CI for between groups difference]: Intervention: 94.7%; Control: 92.5% (1.8 to 2.6)<br>Mean DASH (79 months) [95% CI for between groups difference]: Intervention: 95.8%; Control: 94.5% (1.4 to 3.3)<br>No statistically significant differences between groups in any outcome<br>(I) Redlocation rate: Intervention: 4/20 (13%); Control: 13/20 (65%)<br>Statistical difference between groups, P=0.02<br>Crank test (positive): Intervention: 7/23 (74%); Control: 17/23 (74%)<br>Statistical difference between groups, P=0.008<br>Rouse score (excellent): Intervention: 22/26 (73%); Control: 9/23 (39%)<br>Statistical difference between groups, P=0.003                                                                                                                             | (I) Septic arthritis: Intervention: 1/19 (5%)<br>(II) Not reported                                                                                                                                                                                                                                             | One redlocation in the intervention group occurred according to the Kaplan - Meyer curve at three years, but it seems to be reported to have occurred at two years                                        |
| Witzell, G. (I) 1999 (7), (R) 1999 (16), Sweden                                                                                         | Redlocation rate: Intervention: 3/42 (7%); Control: 12/42 (28%)<br>Statistical difference between groups not reported<br>Sublocation rate: Intervention: 0/42 (0%); Control: 4/42 (10%)<br>Statistical difference between groups not reported                                                                                                                                                                                                                                                                                                                                                                                                                                                                                                                  | (I) Redlocation rate at two years: Intervention: 9/21 (43%)<br>Control: 8/21 (38%)<br>Statistical difference between groups, P=0.03<br>Apprehension and relocation test (positive): Intervention: 5/3%; Control: 7/26 (27%)<br>Redlocation rate at two years: Intervention: 1/37 (3%); Control: 21/39 (54%)<br>Redlocation rate at 10 years: Intervention: 3/36 (8%); Control: 24/39 (62%)<br>Statistical difference between groups, P=0.003<br>Constant score: Intervention: 92.1; Control: 87.7<br>P not significant<br>Redlocation rate at two years: Each number not reported<br>No statistically significant differences between groups                                                                                                                                                                                                                                                                                                                                                                                                                                                                                                                                                                                                                      | (I) No intra or postoperative complications<br>(II) Not reported                                                                                                                                                                                                                                               | Patient materials and outcomes incoherently reported between reports                                                                                                                                      |
| Jakobsen, B. 2007 (13), Denmark                                                                                                         | Redlocation rate: Intervention: 3/42 (7%); Control: 12/42 (28%)<br>Statistical difference between groups not reported<br>Sublocation rate: Intervention: 0/42 (0%); Control: 4/42 (10%)<br>Statistical difference between groups not reported                                                                                                                                                                                                                                                                                                                                                                                                                                                                                                                  | (I) Redlocation rate at two years: Intervention: 9/21 (43%)<br>Control: 8/21 (38%)<br>Statistical difference between groups, P=0.03<br>Apprehension and relocation test (positive): Intervention: 5/3%; Control: 7/26 (27%)<br>Redlocation rate at two years: Intervention: 1/37 (3%); Control: 21/39 (54%)<br>Redlocation rate at 10 years: Intervention: 3/36 (8%); Control: 24/39 (62%)<br>Statistical difference between groups, P=0.003<br>Constant score: Intervention: 92.1; Control: 87.7<br>P not significant<br>Redlocation rate at two years: Each number not reported<br>No statistically significant differences between groups                                                                                                                                                                                                                                                                                                                                                                                                                                                                                                                                                                                                                      | Pain or stiffness of the index shoulder:<br>Intervention: 4/37 (8%); Control: 4/39 (10%)                                                                                                                                                                                                                       |                                                                                                                                                                                                           |
| Robinson, CM. 2006 (6), UK (Scotland)                                                                                                   | Redlocation rate: Intervention: 3/42 (7%); Control: 12/42 (28%)<br>Statistical difference between groups not reported<br>Sublocation rate: Intervention: 0/42 (0%); Control: 4/42 (10%)<br>Statistical difference between groups not reported                                                                                                                                                                                                                                                                                                                                                                                                                                                                                                                  | SF-36, DASH, WOSI and ROM: Exact numbers not reported<br>No statistically significant differences between groups in SF-36 or ROM<br>Statistical difference between groups in DASH and WOSI, P=0.05                                                                                                                                                                                                                                                                                                                                                                                                                                                                                                                                                                                                                                                                                                                                                                                                                                                                                                                                                                                                                                                                | Erythema and swelling: Intervention: 1/42 (2%); Control: 1/42 (2%)<br>Adhesive capsulitis: Intervention: 2/42 (5%); Control: 1/42 (2%)<br>Capsulotomy: Intervention: 3/42 (7%)                                                                                                                                 | Number of patients in results in treatment groups do not match with reported in follow-up<br>Statistical differences between groups in DASH and WOSI are not clinically relevant (differences below MCGI) |
| Arm position<br>Ito, E. 2007 (43), Japan                                                                                                | Recurrence instability rate: Intervention: 22/85 (26%); Control: 31/74 (42%)<br>Absolute RR 16.0%, Relative RR 38.2%<br>Statistical difference between groups, P=0.033                                                                                                                                                                                                                                                                                                                                                                                                                                                                                                                                                                                         | Surgery because of recurrent instability:<br>Intervention: 8/22 (36%); Control: 9/21 (43%)<br>Statistical difference between groups not reported<br>Compliance (full time): Intervention: 63/67 (72%); Control: 39/74 (53%)<br>No statistically significant differences between groups                                                                                                                                                                                                                                                                                                                                                                                                                                                                                                                                                                                                                                                                                                                                                                                                                                                                                                                                                                            | Temporary stiffness:<br>Intervention: 6/65 (7%)                                                                                                                                                                                                                                                                |                                                                                                                                                                                                           |
| Fineston, A. 2009 (41), Israel                                                                                                          | Redlocation rate: Intervention: 22/85 (26%); Control: 31/74 (42%)<br>Absolute RR 16.0%, Relative RR 38.2%<br>Statistical difference between groups, P=0.033                                                                                                                                                                                                                                                                                                                                                                                                                                                                                                                                                                                                    | Surgery because of recurrent instability:<br>Intervention: 8/22 (36%); Control: 9/21 (43%)<br>Statistical difference between groups not reported<br>Mean time to redlocation (months): Intervention: 1.8 (4 to 43); Control: 12.4 (4 to 36)<br>Operative treatment: Total: 6/20 (30%) redlocated shoulder<br>Statistical difference between groups not reported                                                                                                                                                                                                                                                                                                                                                                                                                                                                                                                                                                                                                                                                                                                                                                                                                                                                                                   | Surgery because of recurrent instability: 6/20 (30%)<br>Auxiliary nerve neurectomy: 10/51 (20%)<br>Auxiliary rash: 2/24 (8%)                                                                                                                                                                                   |                                                                                                                                                                                                           |
| Livramento, S. 2011 (44), Norway                                                                                                        | Redlocation rate: Intervention: 28/93 (30%); Control: 23/83 (28%)<br>Recurrence instability rate: Intervention: 31/81 (38%); Control: 35/82 (42%)<br>WOSI (raw, intervention, control) [95% CI for between groups difference]: Intervention: 13.8 (11 to 16.4); Control: 37.5 (35 to 39.9)<br>No statistically significant differences between groups                                                                                                                                                                                                                                                                                                                                                                                                          | Redlocation rate: Intervention: 28/93 (30%); Control: 23/83 (28%)<br>Recurrence instability rate: Intervention: 31/81 (38%); Control: 35/82 (42%)<br>WOSI (raw, intervention, control) [95% CI for between groups difference]: Intervention: 13.8 (11 to 16.4); Control: 37.5 (35 to 39.9)<br>No statistically significant differences between groups                                                                                                                                                                                                                                                                                                                                                                                                                                                                                                                                                                                                                                                                                                                                                                                                                                                                                                             | Hypertensive intervention: 1/91 (1%)<br>Moderate pain: Intervention: 1/91 (1%)<br>Cutaneous hypoaesthesia: Control: 3/93 (3%)                                                                                                                                                                                  |                                                                                                                                                                                                           |
| Harder, K. 2014 (42), Iran                                                                                                              | Recurrence instability rate: Intervention: 2/51 (4%); Control: 17/51 (33.3%)<br>Absolute RR 29.4%, Relative RR: 88.2%<br>Statistical difference between groups, P=0.001                                                                                                                                                                                                                                                                                                                                                                                                                                                                                                                                                                                        | Recurrence instability rate (compliant patients): Intervention: 1/41 (2.4%); Control: 16/48 (33.3%)<br>Between groups difference, P = 0.001<br>Mean WOSI (raw) [SD] (33 months): Intervention: 187.2 (67.5); Control: 230.92 (78.8)<br>Statistical difference between groups, P = 0.004<br>Mean WOSI (%), SD) Baseline -> One year follow-up:<br>Intervention: 32.4% (15.40) -> 87% (14)<br>Control: 32.60% (15.30) -> 84% (12.1)<br>No statistically significant differences between groups<br>Mean ASES (Baseline) -> One year follow-up:<br>Intervention: 38.96 (21.18) -> 95 (15)<br>Control: 46.33 (22.30) -> 89 (14.4)<br>Questionable clinical significance and borderline statistical significance (P=0.05)                                                                                                                                                                                                                                                                                                                                                                                                                                                                                                                                               | Transient shoulder rigidity: Intervention: 3/51 (5.9%)                                                                                                                                                                                                                                                         | Difference between groups in WOSI scores is not clinically relevant (MCGI = 210 points)                                                                                                                   |
| Whelan, D. 2014 (45), Canada                                                                                                            | Redlocation rate: Intervention: 6/27 (22%); Control: 8/25 (32%)<br>Sublocation rate: Intervention: 4/27 (15%); Control: 2/25 (8%)<br>No statistically significant differences between groups                                                                                                                                                                                                                                                                                                                                                                                                                                                                                                                                                                   | Return to sports:<br>Intervention: 21/26 (80%); Intervention: 16/22 (73%); Control: 18/21 (86%)<br>No statistically significant difference between groups<br>Return to preinjury level in sports:<br>Intervention: 14/24 (58%); Intervention: 12/22 (55%); Control: 13/21 (62%)<br>No statistically significant difference between groups                                                                                                                                                                                                                                                                                                                                                                                                                                                                                                                                                                                                                                                                                                                                                                                                                                                                                                                         | Not reported                                                                                                                                                                                                                                                                                                   |                                                                                                                                                                                                           |
| Use of restriction band<br>Ito, E. 2011 (5), Japan                                                                                      | Redlocation rate:<br>Intervention: 10/31 (32%); Intervention: 10/30 (33%); Control: 8/29 (28%)<br>No statistically significant differences between groups                                                                                                                                                                                                                                                                                                                                                                                                                                                                                                                                                                                                      | Return to sports:<br>Intervention: 21/26 (80%); Intervention: 16/22 (73%); Control: 18/21 (86%)<br>No statistically significant difference between groups<br>Return to preinjury level in sports:<br>Intervention: 14/24 (58%); Intervention: 12/22 (55%); Control: 13/21 (62%)<br>No statistically significant difference between groups                                                                                                                                                                                                                                                                                                                                                                                                                                                                                                                                                                                                                                                                                                                                                                                                                                                                                                                         | Not reported                                                                                                                                                                                                                                                                                                   |                                                                                                                                                                                                           |
| Chronic post-traumatic shoulder instability<br>Open versus arthroscopic surgery<br>Sperber, A. 2001 (46), Sweden                        | Recurrence instability rate: Intervention: 7/30 (23%); Control: 3/26 (12%)<br>Statistical difference between groups, P=0.05                                                                                                                                                                                                                                                                                                                                                                                                                                                                                                                                                                                                                                    | Constant score: Intervention: 100 (82-100); Control: 98 (67-100)<br>Statistical difference between groups not reported<br>Rowe score: Intervention: 100 (90-100); Control: 95 (75-100)<br>Statistical difference between groups not reported<br>Loss of external rotation (degrees): Intervention: 9; Control: 10<br>Statistical difference between groups, P=0.04<br>Positive apprehension test: Intervention: 0/23 (0%); Control: 3/23 (13%)<br>Absolute Constant score (SD) (Improvement from baseline (SD)):<br>Intervention: 89.5 (14.25) [21 (15.89)] points<br>Control: 86.7 (16.07) [25 (18.23)] points<br>Relative Constant score (SD) (Score compared to contralateral side):<br>Intervention: 92.1% (15.1); Control: 94.3% (12.37)<br>No statistically significant differences between groups in either outcome<br>Mean Rowe score (SD):<br>Intervention: 91 (15.06); Control: 86.5 (12.92)<br>No statistically significant difference between groups<br>Redlocation rate: 0/20 (0%)<br>MCLA, good/excellent (%): Intervention: 93%; Control: 94.3%<br>Rowe, good/excellent (%): Intervention: 100%; Control: 82.4%<br>RDE: No clinical differences between treatment groups<br>No statistically significant differences between groups in any outcome | Intervention:<br>Long thoracic nerve injury: 1/30 (3%) patients<br>Reoperation: 3/30 (10%) patients<br>Control:<br>Persistent pain: 1/26 (4%) patients<br>Reoperation: 3/26 (12%) patients                                                                                                                     | Secondary outcomes are reported only in stable shoulders                                                                                                                                                  |
| Fabriziani, C. 2004 (2), Italy                                                                                                          | Redlocation rate:<br>Intervention: 10/31 (32%); Intervention: 10/30 (33%); Control: 8/29 (28%)<br>No statistically significant differences between groups                                                                                                                                                                                                                                                                                                                                                                                                                                                                                                                                                                                                      | Return to sports:<br>Intervention: 21/26 (80%); Intervention: 16/22 (73%); Control: 18/21 (86%)<br>No statistically significant difference between groups<br>Return to preinjury level in sports:<br>Intervention: 14/24 (58%); Intervention: 12/22 (55%); Control: 13/21 (62%)<br>No statistically significant difference between groups                                                                                                                                                                                                                                                                                                                                                                                                                                                                                                                                                                                                                                                                                                                                                                                                                                                                                                                         | No intra or postoperative complications                                                                                                                                                                                                                                                                        |                                                                                                                                                                                                           |
| Netto, NA. 2013 (9), Brazil                                                                                                             | Mean DASH (range, SD):<br>Intervention: 2.65 (0 to 24, 47.3); Control: 4.22 (0 to 21, 45.8)<br>Statistical difference between groups, P=0.031                                                                                                                                                                                                                                                                                                                                                                                                                                                                                                                                                                                                                  | Redlocation rate: 0/20 (0%)<br>MCLA, good/excellent (%): Intervention: 93%; Control: 94.3%<br>Rowe, good/excellent (%): Intervention: 100%; Control: 82.4%<br>RDE: No clinical differences between treatment groups<br>No statistically significant differences between groups in any outcome                                                                                                                                                                                                                                                                                                                                                                                                                                                                                                                                                                                                                                                                                                                                                                                                                                                                                                                                                                     | Redlocations: Control: 2/25 (8%)<br>Superficial wound infection: Intervention: 1/22 (5%)                                                                                                                                                                                                                       | UCLA and Rowe scores not reported in numbers                                                                                                                                                              |
| Mohdatt, N. 2014 (47), Canada                                                                                                           | Mean WOSI (%) [CI 95%, SD] Baseline -> Two year follow-up:<br>Intervention: 43.7% (17.9 to 69.5, 219.0) -> 85.3% (66.5 to 99.8, 320.4)<br>Control: 40.6% (16.9 to 64.3, 218.4) -> 81.9% (77.4 to 86.4, 219.8)<br>No statistically significant differences between groups                                                                                                                                                                                                                                                                                                                                                                                                                                                                                       | Mean ASES (CI 95%, SD) Baseline -> Two year follow-up:<br>Intervention: 67.3 (63.5 to 71.0, 218.7) -> 91.8 (88.9 to 94.4, 212.7)<br>Control: 64.0 (59.6 to 68.4, 217.6) -> 88.2 (84.6 to 91.8, 215.9)<br>No statistically significant differences between groups at two year follow-up, but both groups improved from baseline, P=0.05<br>Redlocation rate: Intervention: 3/86 (8.8%); Control: 16/87 (18.4%)<br>Sublocation rate: Intervention: 2/80 (2.5%); Control: 4/87 (4.6%)<br>Statistically significant difference between groups, P=0.05                                                                                                                                                                                                                                                                                                                                                                                                                                                                                                                                                                                                                                                                                                                 | Intervention:<br>Temporary nerve dysfunction (resolved completely): 3/79 (3.8%)<br>Superficial wound infection: 2/79 (2.5%)<br>Stitch abscess: 1/79 (1.3%)<br>Allergic reaction to NSAIDs: 2/79 (2.5%)<br>Control:<br>Temporary nerve dysfunction (resolved uneventfully): 4/81 (1.2%)                         |                                                                                                                                                                                                           |
| Absorbable versus nonabsorbable implant materials (anchors)<br>Warne, WJ. 1999 (50), USA                                                | Redlocation rate:<br>Intervention: 10/31 (32%); Intervention: 10/30 (33%); Control: 8/29 (28%)<br>No statistically significant differences between groups                                                                                                                                                                                                                                                                                                                                                                                                                                                                                                                                                                                                      | Mean loss of external rotation, ER (degrees):<br>Intervention: 3 (0-15)<br>Control: 3 (0-10)<br>Mean Rowe score baseline -> two year follow-up (SD):<br>Intervention: 47 (13) -> 96 (12)<br>Control: 47 (14) -> 93 (10)<br>No statistically significant difference in postoperative scores between groups, P=0.55<br>Stability testing: Not reported<br>Drill holes in radiographs (at two years): "Uniformly difficult to distinguish"<br>Recurrence dislocation: Intervention: 1/18 (5%) patients - Control: 3/20 (5%) patients<br>Sublocation: Control: 3/20 (5%) patients                                                                                                                                                                                                                                                                                                                                                                                                                                                                                                                                                                                                                                                                                     | Not reported                                                                                                                                                                                                                                                                                                   | Outcomes were not defined preoperatively                                                                                                                                                                  |
| Tan, C. 2006 (49), UK                                                                                                                   | Redlocation rate:<br>Intervention: 10/31 (32%); Intervention: 10/30 (33%); Control: 8/29 (28%)<br>No statistically significant differences between groups                                                                                                                                                                                                                                                                                                                                                                                                                                                                                                                                                                                                      | Baseline -> Two year follow-up:<br>Mean OSS (SD): Intervention: 18 (18) -> 18 (46) - Control: 36 (17) -> 20 (410)<br>Statistical difference between groups, P=0.007<br>Mean VAS pain (SD): Intervention: 1.7 (11.8) -> 0.3 (10.7) - Control: 1.8 (41.3) -> 0.7 (11.6)<br>Mean VAS instability (SD): Intervention: 4.0 (42.3) -> 0.8 (10.2) - Control: 4.7 (13.0) -> 1.1 (10.3)<br>Mean SF-12 Mental (SD): Intervention: 45.0 (7.7) -> 50 (10) - Control: 43 (8.8) -> 54 (18)<br>Mean SF-12 Mental (SD): Intervention: 55 (15) -> 53 (17) - Control: 53 (18) -> 55 (16)<br>No statistically significant differences in improvement between groups in any outcome<br>Median Rowe (range) [CI 95%]:<br>Intervention: 100 (60 to 100) - Control: 100 (25 to 100) [-12.1 to 3.70]<br>Median Constant score (range) [CI 95%]:<br>Intervention: 98 (81 to 107) - Control: 98 (70 to 121) [-5.44 to 1.88]<br>Recurrence instability: Intervention: 3/26 (5%); Control: 2/18 (6%)<br>No statistically significant differences between groups in any outcome                                                                                                                                                                                                                | Redlocation: Intervention: 4/63 (5%); Control: 3/61 (7%)<br>Sublocation: Control: 4/61 (7%)<br>Revision surgery: 6/124 (5%)<br>Superficial wound infection: Intervention: 1/63 (2%) - Control: 1/61 (2%)                                                                                                       |                                                                                                                                                                                                           |
| Milano, G. 2010 (48), Italy                                                                                                             | Median DASH (range) [CI 95%]:<br>Intervention: 4.5 (0 to 27); Control: 7 (0 to 25) [-3.25 to 2.84]<br>No statistically significant differences between groups                                                                                                                                                                                                                                                                                                                                                                                                                                                                                                                                                                                                  | Median Rowe (range) [CI 95%]:<br>Intervention: 100 (60 to 100) - Control: 100 (25 to 100) [-12.1 to 3.70]<br>Median Constant score (range) [CI 95%]:<br>Intervention: 98 (81 to 107) - Control: 98 (70 to 121) [-5.44 to 1.88]<br>Recurrence instability: Intervention: 3/26 (5%); Control: 2/18 (6%)<br>No statistically significant differences between groups in any outcome                                                                                                                                                                                                                                                                                                                                                                                                                                                                                                                                                                                                                                                                                                                                                                                                                                                                                   | Not reported                                                                                                                                                                                                                                                                                                   |                                                                                                                                                                                                           |
| Arthroscopic versus arthroscopic surgery                                                                                                |                                                                                                                                                                                                                                                                                                                                                                                                                                                                                                                                                                                                                                                                                                                                                                |                                                                                                                                                                                                                                                                                                                                                                                                                                                                                                                                                                                                                                                                                                                                                                                                                                                                                                                                                                                                                                                                                                                                                                                                                                                                   |                                                                                                                                                                                                                                                                                                                |                                                                                                                                                                                                           |
| Castagna, A. 2009 (51), Italy                                                                                                           | Median ROM Baseline -> Two year follow-up:<br>FF (Forward flexion, degrees):<br>Intervention: 169 (18-185) -> 172.5 (155-180)<br>Control: 177 (170-180) -> 163.3 (140-173)<br>ER1 (External rotation, arm at side, degrees):<br>Intervention: 61 (40-80) -> 63.7 (45-80)<br>Control: 57.2 (45-80) -> 58.9 (40-80)<br>ER2 (External rotation, arm 90 degrees abducted, degrees):<br>Intervention: 69.8 (70-120) -> 60.4 (80-95)<br>Control: 68.9 (80-95) -> 60.1 (70-95)<br>IR1 (Internal rotation, arm 90 degrees abducted, degrees):<br>Intervention: 50.6 (40-80) -> 61.8 (40-80)<br>Control: 45.6 (60-70) -> 63.3 (45-75)<br>Statistically significant difference between intervention and control groups regarding the change of forward flexion (P<0.001) | Mean Constant Baseline -> Two year follow-up:<br>Intervention: 21.1 (55-80) -> 89 (127-177)<br>Control: 75 (67-80) -> 89 (84-92)<br>Statistical difference between groups in improvement, P=0.001<br>Mean UCLA Baseline -> Two year follow-up:<br>Intervention: 24.1 (14-31) -> 43.1 (18)<br>Control: 24.4 (20-26) -> 34.7 (22-35)<br>No statistically significant difference between groups in increase, P=0.293<br>Mean ASES Baseline -> Two year follow-up:<br>Intervention: 66.9 (83-105) -> 135 (110-120)<br>Control: 97.8 (69-106) -> 118.6 (116-116)<br>No statistically significant difference between groups in increase, P=0.089<br>Post-hoc:<br>Recurrence instability:<br>Intervention: 3/20 (5%) patients - Control: 0/20 (0%)                                                                                                                                                                                                                                                                                                                                                                                                                                                                                                                       | "No patients showed clinical signs of superficial or deep infection or intra and postoperative neuro-vascular complications."                                                                                                                                                                                  |                                                                                                                                                                                                           |
| Absorbable versus nonabsorbable implant materials (tacks)<br>(I) Magnusson, L. 2006 (55), Sweden<br>(II) Eriksson, A. 2006 (56), Sweden | (I) Drill hole visibility: More visible in the intervention group (P<0.004)<br>(II) Drill hole visibility: More visible in the intervention group (P<0.0003)                                                                                                                                                                                                                                                                                                                                                                                                                                                                                                                                                                                                   | Baseline -> (I) Two year follow-up -> (II) Seven year follow-up<br>Constant score (range):<br>Intervention: 77 (25 to 80) -> 84 (35 to 97) -> 84.5 (29 to 90)<br>Control: 62 (42-80) -> 87 (41 to 100) -> 88 (25 to 95)<br>No statistical difference between groups<br>Rowe score (range):<br>Intervention: 55.5 (39 to 88) -> 90 (25 to 100) -> 89 (49 to 100)<br>Control: 59 (40 to 93) -> 90 (30 to 100) -> 85.5 (27 to 98)<br>No statistical difference between groups<br>ROM: No statistical difference between groups<br>Muscle strength: No statistical difference between groups<br>Redlocation + sublocation:<br>(I) Intervention: 3/20 (5%) patients - Control: 3/20 (5%) patients<br>(II) Intervention: 1 + 1 patients - Control: 2 + 1 patients<br>No statistical difference between groups                                                                                                                                                                                                                                                                                                                                                                                                                                                           | (I) Reflex sympathetic dystrophy: Control: 1/20 (5%)<br>(II) Intervention: 3 patients had early (1 day to 4 weeks) unspecified symptoms as pain, grinding and low grade fever (absided in 4 hours), 1 patient developed severe restriction in ROM, 1 patient developed moderate degenerative arthritic changes | Failure rate reported for 36 patients, which does not match with the number of patients at the end of the follow-up                                                                                       |
| Absorbable versus nonabsorbable suture materials<br>Monteiro, GC. 2008 (57), Brazil                                                     | Redlocation rate:<br>Intervention: 10/31 (32%); Intervention: 10/30 (33%); Control: 8/29 (28%)<br>No statistically significant differences between groups                                                                                                                                                                                                                                                                                                                                                                                                                                                                                                                                                                                                      | Mean Rowe (range):<br>Intervention: 83.81 (35 to 100)<br>Control: 79.58 (35 to 100)<br>Mean ASES (range):<br>Intervention: 84.09 (40 to 98)<br>Control: 79.25 (40 to 98)<br>Mean deficit in ER (degrees, range): 5 (3 to 12)<br>Failure (not defined):<br>Intervention: 2/21 (10%) patients<br>Control: 3/24 (12.5%) patients<br>No statistical differences between groups                                                                                                                                                                                                                                                                                                                                                                                                                                                                                                                                                                                                                                                                                                                                                                                                                                                                                        | Not reported                                                                                                                                                                                                                                                                                                   | Results given for followed patients only<br>"Failure" is not further defined<br>Functional examinations are not further defined                                                                           |
| Rehabilitation<br>Kim, S-H. 2003 (58), Korea                                                                                            | Redlocation rate: 0/62 (0%)<br>Sublocation rate: 0/62 (0%)<br>No statistically significant differences between groups                                                                                                                                                                                                                                                                                                                                                                                                                                                                                                                                                                                                                                          | Baseline -> Two year follow-up:<br>Mean UCLA (range, SD):<br>Intervention: 13.7 (14 to 23, 42.3) -> 32.7 (27 to 35, 42.3)<br>Control: 18.5 (13 to 22, 42.4) -> 32.1 (27 to 35, 42.3)<br>Mean ASES (range, SD):<br>Intervention: 49.9 (40 to 66, 45.7) -> 88.1 (70 to 98, 49.9)<br>Control: 49.3 (36 to 67, 48.8) -> 88.0 (70 to 98, 47.7)<br>Mean Rowe (range, SD):<br>Intervention: 23.8 (10 to 40, 47.9) -> 91.9 (55 to 100, 49.9)<br>Control: 22.7 (10 to 40, 48.7) -> 90.5 (55 to 100, 49.7)<br>No statistically significant differences between groups in any outcome                                                                                                                                                                                                                                                                                                                                                                                                                                                                                                                                                                                                                                                                                        | Not reported                                                                                                                                                                                                                                                                                                   |                                                                                                                                                                                                           |
| Anatomic versus nonanatomic surgical techniques<br>Salomonsson, B. 2009 (52), Sweden                                                    | Redlocation rate:<br>Intervention: 10/31 (32%); Intervention: 10/30 (33%); Control: 8/29 (28%)<br>No statistically significant differences between groups                                                                                                                                                                                                                                                                                                                                                                                                                                                                                                                                                                                                      | Mean Rowe at two years: Intervention: 90; Control: 90<br>Mean WOSI (%) (range) at 10 years:<br>Intervention: 83% (78 to 88); Control: 80% (75 to 86)<br>No statistically significant difference between groups<br>Recurrence instability rate at 10 years: Intervention: 0/33 (0%); Control: 10/30 (33%)<br>Redlocation rate at 10 years: Intervention: 11/32 (34%); Control: 8/30 (27%)<br>No statistically significant difference between groups<br>Revision surgery at 10 years: Intervention: 4/22 (18%); Control: 4/30 (13%)                                                                                                                                                                                                                                                                                                                                                                                                                                                                                                                                                                                                                                                                                                                                 | Not reported                                                                                                                                                                                                                                                                                                   |                                                                                                                                                                                                           |

Abbreviations  
 ASES - American Shoulder and Elbow Surgeons Standardized Shoulder Assessment Score  
 AOSW - Athletic Shoulder Outcome Scoring System  
 CI - Confidence Interval  
 DASH - Disabilities of Arm, Shoulder and Hand  
 OSS - Oxford Shoulder Instability Score  
 ROM - Range of Motion  
 SANE - Single Assessment Numeric Evaluation Score  
 SD - Standard Deviation  
 SF - The Short Form Health Survey  
 UCLA - University of California, Los Angeles Shoulder Score  
 WOSI - Western Ontario Shoulder Instability Index
