# Supplementary material for: Treatment after traumatic shoulder dislocation: a systematic review with a network meta-analysis
Source: PubMed Central journal article supplement — Br J Sports Med. 2018 Jun 23;52(23):1498–506. doi: 10.1136/bjsports-2017-098539 (PMC6241619; doi:10.1136/bjsports-2017-098539), 2018-06-23
Supplement: bjsports-2017-098539supp016.pdf [file bjsports-2017-098539supp016.pdf]

| <b>Appendix Table 6. Levels of evidence of included trials</b>                                                                                                                                                                                                                                                                                                                                                                            |                                                               |                                                   |                                                             |
|-------------------------------------------------------------------------------------------------------------------------------------------------------------------------------------------------------------------------------------------------------------------------------------------------------------------------------------------------------------------------------------------------------------------------------------------|---------------------------------------------------------------|---------------------------------------------------|-------------------------------------------------------------|
| <b>Author, Year, Country</b>                                                                                                                                                                                                                                                                                                                                                                                                              | <b>Level of evidence reported in the original publication</b> | <b>Level of evidence according to OCEBM 2009*</b> | <b>Level of evidence according to OCEBM 2011 revision**</b> |
| Kirkley, A. (I) 1999 (4), (II) 2005 (15), Canada                                                                                                                                                                                                                                                                                                                                                                                          | (I) NR<br>(II) 2                                              | 1                                                 | 2                                                           |
| Wintzell, G. (I) 1999 (7), (II) 1999 (16), Sweden                                                                                                                                                                                                                                                                                                                                                                                         | (I) NR<br>(II) NR                                             | 1                                                 | 2                                                           |
| Jakobsen, B. 2007 (3), Denmark                                                                                                                                                                                                                                                                                                                                                                                                            | 1                                                             | 1                                                 | 2                                                           |
| Robinson, CM. 2008 (6), UK (Scotland)                                                                                                                                                                                                                                                                                                                                                                                                     | 1                                                             | 1                                                 | 2                                                           |
| Itoi, E. 2007 (43), Japan                                                                                                                                                                                                                                                                                                                                                                                                                 | 2                                                             | 2                                                 | 2                                                           |
| Finestone, A. 2009 (41), Israel                                                                                                                                                                                                                                                                                                                                                                                                           | NR                                                            | 1                                                 | 2                                                           |
| Liavaag, S. 2011 (44), Norway                                                                                                                                                                                                                                                                                                                                                                                                             | 1                                                             | 1                                                 | 2                                                           |
| Heidari, K. 2014 (42), Iran                                                                                                                                                                                                                                                                                                                                                                                                               | 1                                                             | 1                                                 | 2                                                           |
| Whelan, D. 2014 (45), Canada                                                                                                                                                                                                                                                                                                                                                                                                              | 1                                                             | 1                                                 | 2                                                           |
| Itoi, E. 2013 (53), Japan                                                                                                                                                                                                                                                                                                                                                                                                                 | 2                                                             | 1                                                 | 2                                                           |
| Sperber, A. 2001 (46), Sweden                                                                                                                                                                                                                                                                                                                                                                                                             | NR                                                            | 1                                                 | 2                                                           |
| Fabbriciani, C. 2004 (2), Italy                                                                                                                                                                                                                                                                                                                                                                                                           | 1                                                             | 1                                                 | 2                                                           |
| Netto, NA. 2012 (5), Brazil                                                                                                                                                                                                                                                                                                                                                                                                               | 2                                                             | 1                                                 | 2                                                           |
| Mohtadi, N. 2014 (47), Canada                                                                                                                                                                                                                                                                                                                                                                                                             | 1                                                             | 1                                                 | 2                                                           |
| Warme, WJ. 1999 (50), USA                                                                                                                                                                                                                                                                                                                                                                                                                 | NR                                                            | 1                                                 | 2                                                           |
| Tan, C. 2006 (49), UK                                                                                                                                                                                                                                                                                                                                                                                                                     | 1                                                             | 1                                                 | 2                                                           |
| Milano, G. 2010 (48), Italy                                                                                                                                                                                                                                                                                                                                                                                                               | NR                                                            | 1                                                 | 2                                                           |
| Castagna, A. 2009 (51), Italy                                                                                                                                                                                                                                                                                                                                                                                                             | NR                                                            | 1                                                 | 2                                                           |
| (I) Magnusson, L. 2006 (55), Sweden<br>(II) Elmlund, A. 2009 (56), Sweden                                                                                                                                                                                                                                                                                                                                                                 | (I) 1<br>(II) 1                                               | 1                                                 | 2                                                           |
| Monteiro, GC. 2008 (57), Brazil                                                                                                                                                                                                                                                                                                                                                                                                           | 2                                                             | 1                                                 | 2                                                           |
| Kim, S-H. 2003 (58), Korea                                                                                                                                                                                                                                                                                                                                                                                                                | NR                                                            | 1                                                 | 2                                                           |
| Salomonsson, B. 2009 (52), Sweden                                                                                                                                                                                                                                                                                                                                                                                                         | NR                                                            | 1                                                 | 2                                                           |
| <b>Abbreviations</b>                                                                                                                                                                                                                                                                                                                                                                                                                      |                                                               |                                                   |                                                             |
| <b>NR - Not reported</b>                                                                                                                                                                                                                                                                                                                                                                                                                  |                                                               |                                                   |                                                             |
| *Oxford Centre of Evidence-Based Medicine (OCEBM) Levels of Evidence Working Group. The Oxford levels of evidence 2009. <a href="https://www.cebm.net/2009/06/oxford-centre-evidence-based-medicine-levels-evidence-march-2009/">https://www.cebm.net/2009/06/oxford-centre-evidence-based-medicine-levels-evidence-march-2009/</a>                                                                                                       |                                                               |                                                   |                                                             |
| **Oxford Centre of Evidence-Based Medicine (OCEBM) 2011 update:<br>Jeremy Howick, Iain Chalmers, Paul Glasziou, Trish Greenhalgh, Carl Heneghan, Alessandro Liberati, Ivan Moschetti, Bob Phillips, and Hazel Thornton. "The 2011 Oxford CEBM Evidence Levels of Evidence(Introductory Document)". Oxford Centre for Evidence-Based Medicine. <a href="https://www.cebm.net/index.aspx?o=5653">https://www.cebm.net/index.aspx?o=5653</a> |                                                               |                                                   |                                                             |
